# Supplementary material for: Systemic loss of Sarm1 protects Schwann cells from chemotoxicity by delaying axon degeneration
Source: PubMed Central journal article supplement (PMC6992705; doi:10.1038/s42003-020-0776-9), 2020-01-30
Supplement: 42003_2020_776_MOESM8_ESM.pdf [file 42003_2020_776_MOESM8_ESM.pdf]

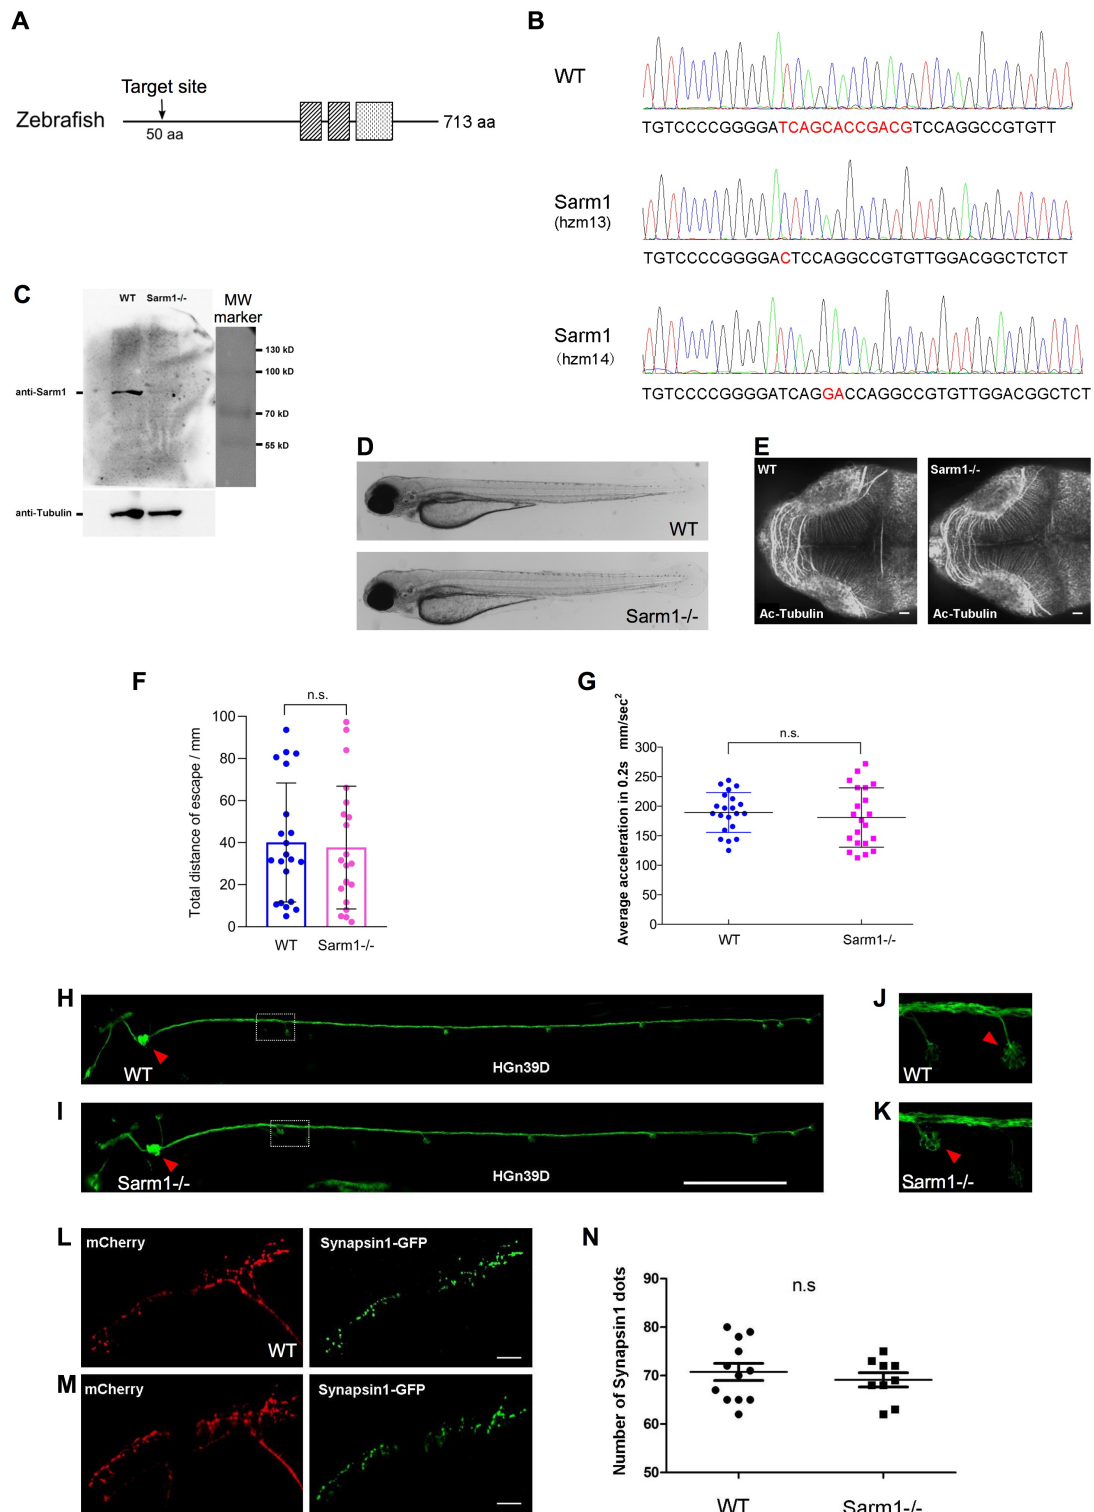

1  
2  
3  
4  
5

**Supplemental Figure 1. A)** Structure of zebrafish Sarm1 highlighting the two SAM domains (dark grey), the TIR domain (light grey). The downward arrow indicated the region targeted for mutagenesis, approximately 50 codons from the start codon. **B)** Sequence of the wild-type Sarm1 indicating in red the mutagenized

6 area and, below, the two mutant alleles obtained in this study. The *hzm13* allele  
7 introduces an 11-base deletion and T/C mutation, resulting in a frame shift and  
8 premature stop codon. The *hzm14* allele is a 7-base deletion and AG/GA  
9 mutation that also generates a frame shift and premature stop codon. **C)** Western  
10 blot of protein extracts from wild type and *Sarm1<sup>hzm13</sup>* fish embryos using a  
11 commercial ant-Sarm1 antibody, revealing absence of the protein in the mutants.  
12 An antibody to alpha-Tubulin was used as loading control. **D)** Low-magnification  
13 image of a wild-type 5dpf zebrafish (top) and a homozygous *Sarm1<sup>hzm13</sup>* (bottom),  
14 showing no overall anatomical differences. **E)** Confocal image of a wild-type 5dpf  
15 zebrafish (left) and a homozygous *Sarm1<sup>hzm13</sup>* (right) stained with an antibody to  
16 acetylated Tubulin to mark neurons in the central nervous system, showing no  
17 evident defects in the mutants. In this and all figures, rostral is left and caudal is  
18 right. Scale bar 20µm. **F-G)** Quantification of sensorimotor function in zebrafish.  
19 (H) shows the total distance traveled by larvae after touch-trigger escape response in  
20 wild-type (dashed blue bar) and homozygous *Sarm1<sup>hzm13</sup>* (dashed magenta bar). (I)  
21 dot plot of the average acceleration of wild-type (blue) and homozygous *Sarm1<sup>hzm13</sup>*  
22 (magenta) after tactile touch-induced escape response. Error bar = SEM; n.s. means  
23 no significant difference, Student's t test. wild type n=21, *Sarm1<sup>-/-</sup>* n=21. **H-I)**  
24 Confocal image of a 5dpf wild-type (H) and *Sarm1<sup>-/-</sup>* (I) larvae carrying the  
25 *Tg[HGn39D]* transgene to mark lateralis afferent neurons with GFP. The posterior  
26 lateral-line ganglion is indicated with a red arrowhead. The dotted box indicates an  
27 innervated neuromast (expanded in C). Scale bar 400µm. **J-K)** Confocal image of  
28 the peripheral arborization of lateralis neurons in 5dpf wild-type (H) and *Sarm1<sup>-/-</sup>*  
29 (I). Red arrows indicate the position of a neuromast from the dotted boxes in (H-I).  
30 **L-M)** Confocal image of the central arborization of lateralis neurons in 5dpf wild-  
31 type (L) and *Sarm1<sup>-/-</sup>* (M), mCherry (red) and Synapsin1-GFP (green) to reveal  
32 normal arborization and pre-synaptic puncta in both cases. **N)** Quantification of  
33 the number of synapsin1 puncta from (E-F), Error bar = SEM; n.s. = not  
34 significant, Student's t test. Wild type n=15, *Sarm1<sup>-/-</sup>* n=15.

35

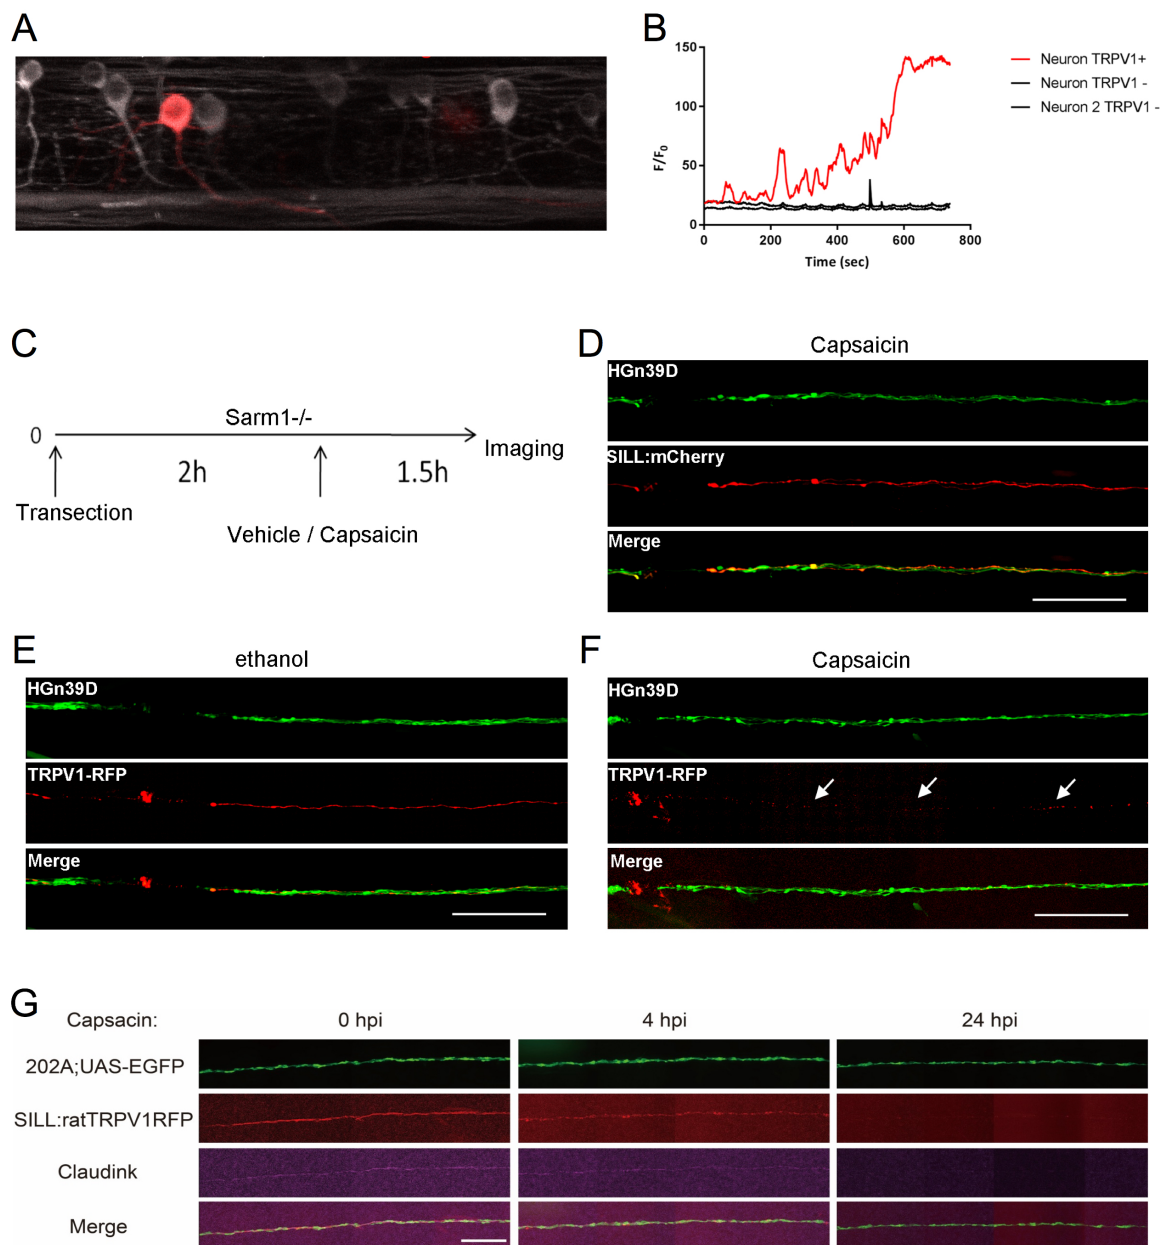

36

37

38

39

40

41

42

43

44

45

**Supplemental Figure 2.** **A)** Confocal image of UAS-TRPV1-tagRFP1 (red, injected) and UAS-GCaMP (green, transgenic) labeled neurons with *Cntn1b:KalTA4*. **B)** Quantification of the calcium signal after capsaicin incubation. Red plot indicated the TRPV1 positive neuron. The black plots indicated two TRPV1 negative neurons. **C)** Schematic representation of the experimental strategy to synthetically elevate calcium in *Sarm1*-deficient transected axons. Lateralis sensory neurons were made to express a transgene coding for the rat transient receptor potential cation channel subfamily V member 1 (TRPV1) fused to RFP, or simply mCherry. Two hours after axon transection, zebrafish

46 larvae were bathed in ethanol solution (control), or ethanol containing capsaicin, a  
47 natural activator of TRPV1. 90 minutes after treatments, larvae were imaged by  
48 confocal microscopy to assess the extent of distal segment degradation. **D)** *Sarm1*-  
49 *-/-* fish expressing GFP in all lateralis neurons (*Tg[HGn39D]*) and mCherry in a  
50 mosaic manner in some neurons. Scale bars 100 $\mu$ m. **E)** *Sarm1*-mutant fish  
51 expressing GFP in all lateralis neurons and TRPV1-RFP in a mosaic manner. Scale  
52 bars 100 $\mu$ m. **F)** *Sarm1*-mutant fish expressing GFP in all lateralis neurons and  
53 TRPV1-RFP in a mosaic manner. Capsaicin treatment induced transected axon  
54 degradation (former location of the axon signaled by three white arrows). Scale bars  
55 100 $\mu$ m. PS: *Tg[Sarm1<sup>-/-</sup>; 202A; UAS-EGFP; SILL:mCherry]*, 4dpf, incubated  
56 with capsaicin for 2 hours, then withdraw capsaicin. **G)** These images show a  
57 *Sarm1*-mutant specimen. Schwann cells (green) were stained with anti-Claudin-k  
58 antibody (magenta) and neurons expressing ratTRPV1-RFP (red), with indicated  
59 time points after axon severing and capsaicin treatment (hpi : hours post induction),  
60 showing that upon synthetic axonal degradation by TRPV1 activation, Schwann  
61 cells cease to express a terminal differentiation marker.

62  
63

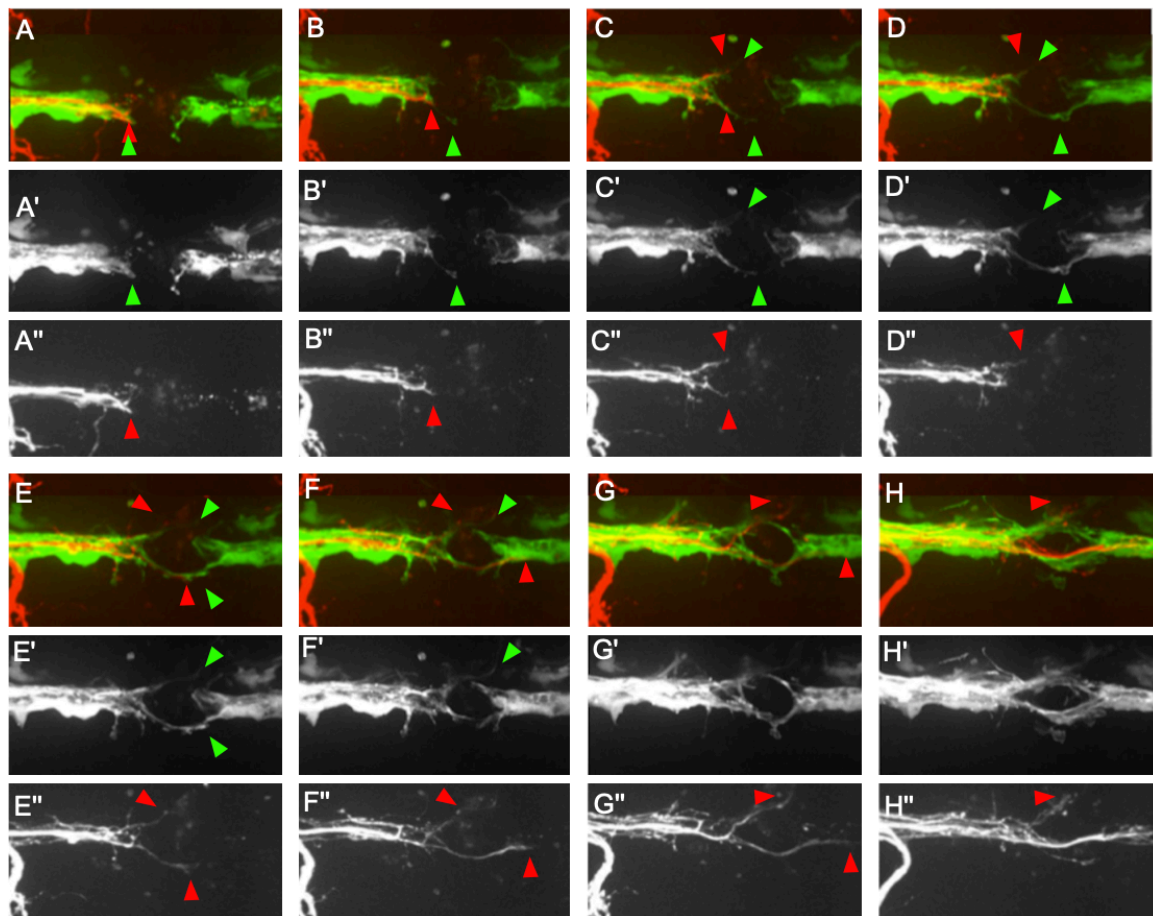

64  
65  
66  
67  
68  
69  
70  
71  
72  
73  
74  
75  
76  
77  
78

**Supplemental Figure 3.** Series of still images taken from Supplemental Movie 1 (also shown in Figure 6, panel E). They show eight time points during the repair of the gap in the glial scaffold (A'-H') and axonal regeneration after transection (A''-H'') in a wild-type animal. Rostral is left and caudal is right. In all panels, the red arrowheads signal the location of the pioneering growth cone of the regenerating axons. The green arrowheads mark the filopodia-like extensions from Schwann cells adjacent to the glial gap. At the start of the series, the axonal terminal stump and the Schwann cells proximal to the gap co-localize (juxtaposition of the green and red arrowhead). In C', a Schwann cell extends a filopodium across the gap, whereas the axons (C'') do not grow along this extension of across the gap. In D', several extensions from Schwann cells are clearly visible at the top and bottom aspects of the image. The shape of the lower extension from a Schwann cell did not change shape, suggesting that they are stabilized, perhaps through interactions with the substrate. Proximal axons (D'') start to grow along these Schwann-cell

79 protrusions. In E', the extensions from the anterior and posterior Schwann cells  
 80 have crossed the gap, physically interact and commence to reconstitute a  
 81 continuous glial scaffold. The axonal projections (E''), however, have suffered a  
 82 retraction towards the proximal stump. F'-H' show a continuation of Schwann cells  
 83 behavior, increasing the contacts and closing the gap, which is obvious by the  
 84 smaller area of the gap (distance between proximal and distal Schwann cells). F''-  
 85 H'' show a more robust and persistent extension of the axonal growth cones, which  
 86 grow nearly strictly along the Schwann cells extensions. Although the gap in the  
 87 glial scaffold is much reduced, nerve fibers show discrete defasciculation (H'').  
 88

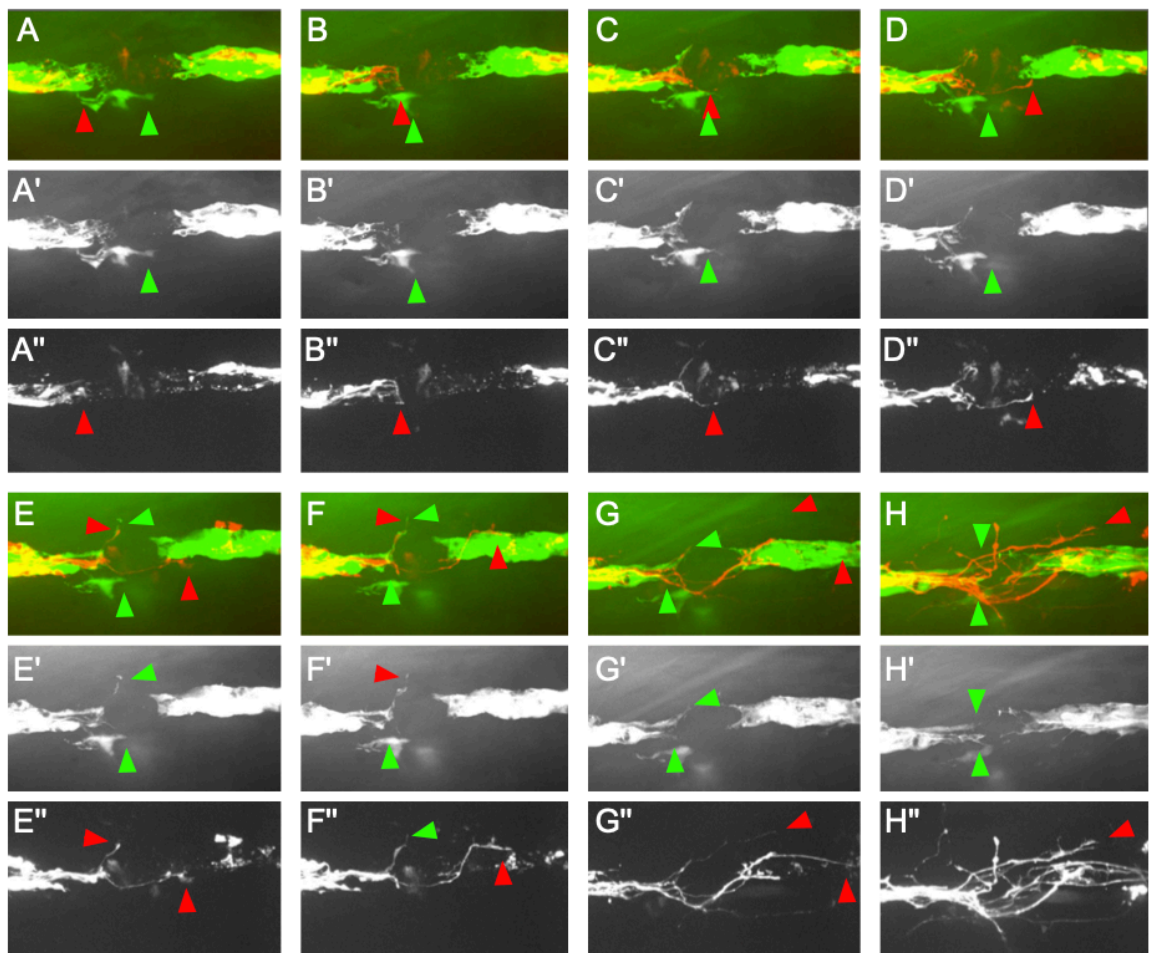

89  
 90 **Supplemental Figure 4.** Series of still images taken from Supplemental Movie 2  
 91 (also shown in Figure 6, panel F). They show eight time points during the repair of  
 92 the gap in the Schwann-cell scaffold (A'-H') and axonal regeneration after  
 93 transection (A''-H''), in a Sarm1-mutant specimen. In all panels, the red

94 arrowheads signal the location of the pioneering growth cone of the regenerating  
95 axons, and the green arrowheads mark filopodia-like extensions from Schwann  
96 cells. Unlike the wild-type situation shown in Supplemental Figure 1, the Schwann  
97 cells adjacent to the gap form small filopodia-like extensions, but which never cross  
98 the gap. The proximal axon stumps eventually form growth cones that cross the  
99 gap at various locations and, upon finding distal Schwann cells, grow along the glial  
100 scaffold (E''-H''). Nerve fibers show extensive local defasciculation (H'').
